# Supplementary material
Source: Springer Nature journal article supplement (https://www.springermedizin.de/resource/supplementary/12913_2008_907_MOESM1_ESM.pdf/9536422)
Supplement: MOESM1 [file 9536422]

## Policy makers

Sustainability

- Political support
- Public policy reform
- Government commitment
- Increased health expenditure
- Resource allocation

Feasibility

- Self-reliance
- Community innovations
- Informal relationships
- Health workers' advocacy
- Social networks

## Community
